# Supplementary material for: Mapping co-ancestry connections between the genome of a Medieval individual and modern Europeans
Source: PubMed Central journal article supplement (PMC7176696; doi:10.1038/s41598-020-64007-2), 2020-04-22
Supplement: 41598_2020_64007_MOESM1_ESM.pdf [file 41598_2020_64007_MOESM1_ESM.pdf]

## **Mapping co-ancestry connections between the genome of a Medieval individual and modern Europeans**

Manuel Ferrando-Bernal<sup>1+</sup>, Carlos Morcillo-Suarez<sup>1+</sup>, Toni de-Dios<sup>1+</sup>, Pere Gelabert<sup>1,2</sup>, Sergi Civit<sup>3</sup>, Antonia Díaz-Carvajal<sup>4</sup>, Imma Ollich-Castanyer<sup>4</sup>, Morten E. Allentoft<sup>5</sup>, Sergi Valverde<sup>1</sup>, Carles Lalueza-Fox<sup>1\*</sup>

<sup>1</sup>Institute of Evolutionary Biology (CSIC-Universitat Pompeu Fabra), 08003 Barcelona (Spain)

<sup>2</sup>Department of Evolutionary Anthropology, University of Vienna, Vienna, Austria

<sup>3</sup>Departament d'Estadística, Facultat de Biologia, Universitat de Barcelona, 08028 Barcelona (Spain)

<sup>4</sup> Grup de Recerca d'Arqueologia Medieval i Postmedieval (GRAMP-UB), Departament d'Història i Arqueologia, Facultat de Geografia i Història, Universitat de Barcelona, 08001 Barcelona (Spain)

<sup>5</sup> Lundbeck Foundation GeoGenetics Centre, The Globe Institute, University of Copenhagen, 1350 Copenhagen (Denmark)

## Supplementary Figures

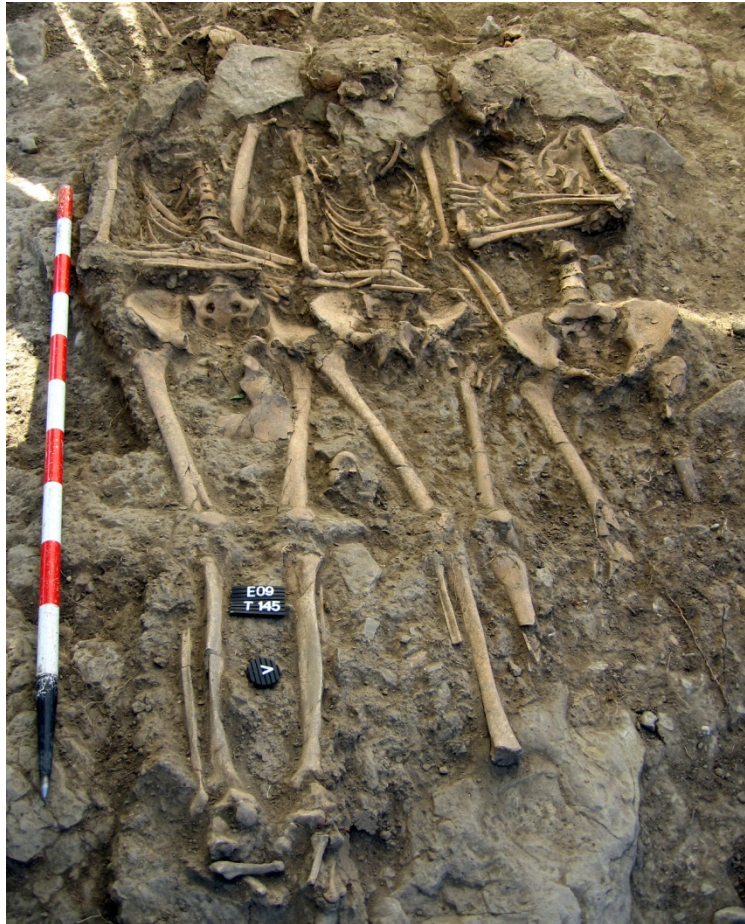

**Supplementary Figure S1.** The XIVth century skeleton from L'Esquerda, labeled T-145-2, sequenced in this study.

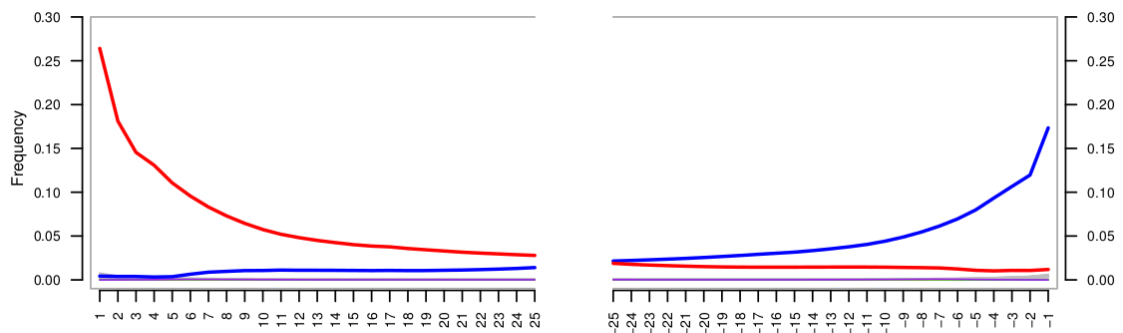

**Supplementary Figure S2.** *Post-mortem* damage due to ancient DNA deamination processes at the ends of the reads of the T-145-2 sample.

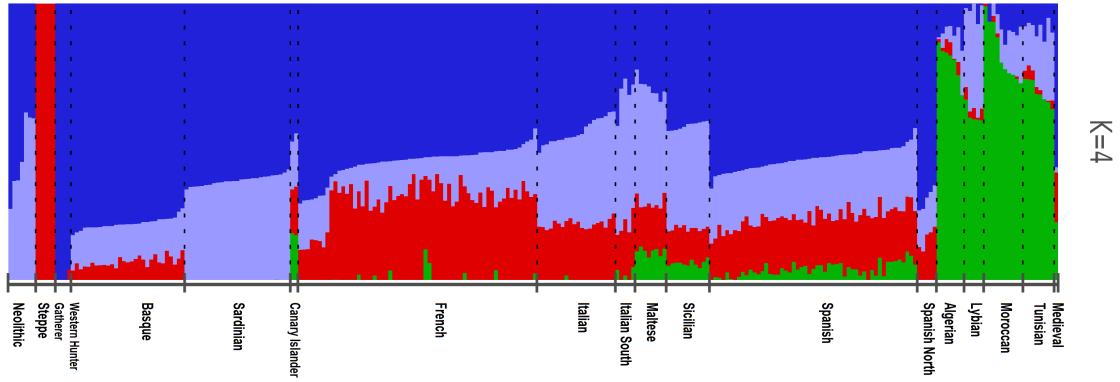

**Supplementary Figure S3.** ADMIXTURE genetic analysis of the Medieval individual in the context of modern Europeans and North Africans (K=4). Some ancient genomes have been added to show their main contributing ancestry components.

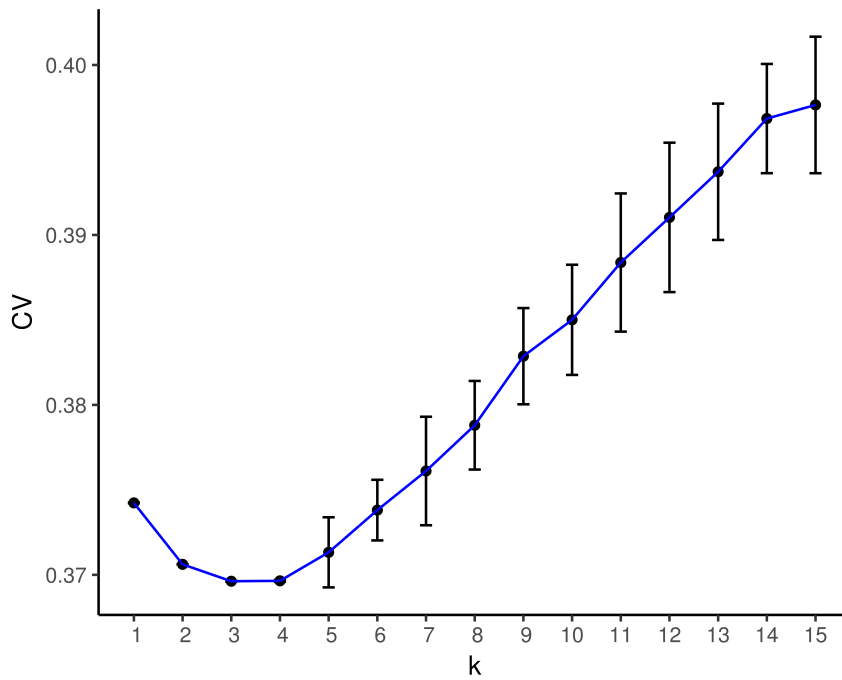

**Supplementary Figure S4.** ADMIXTURE cross-validation for K values 1-15.

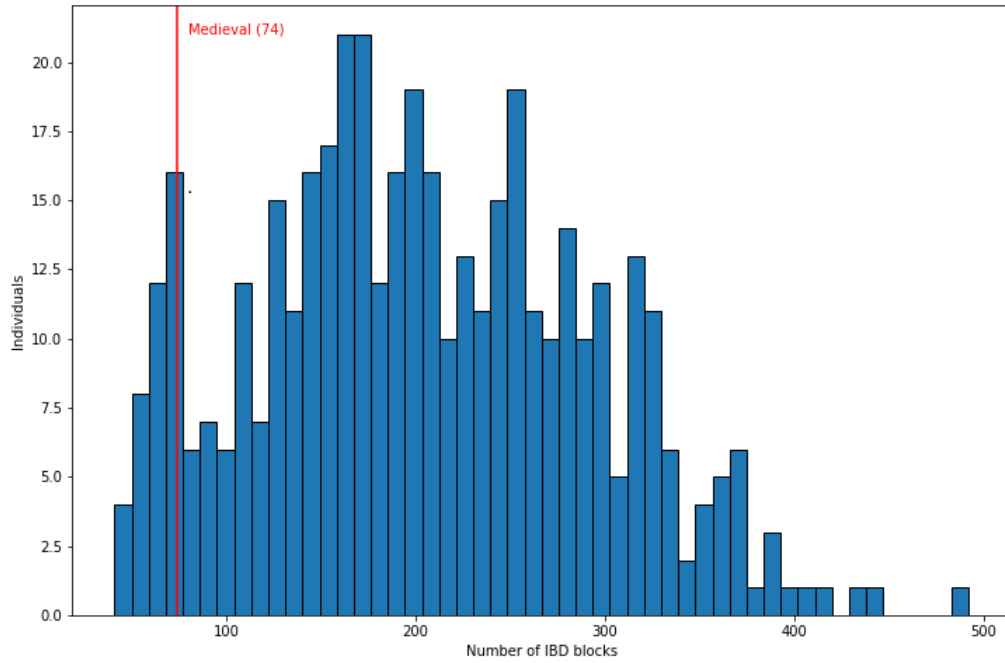

**Supplementary Figure S5.** Distribution of the number of IBD blocks >1cM that each individual shares with individuals from other populations. In red, the number of IBD blocks shared by the Medieval with individuals of any population.

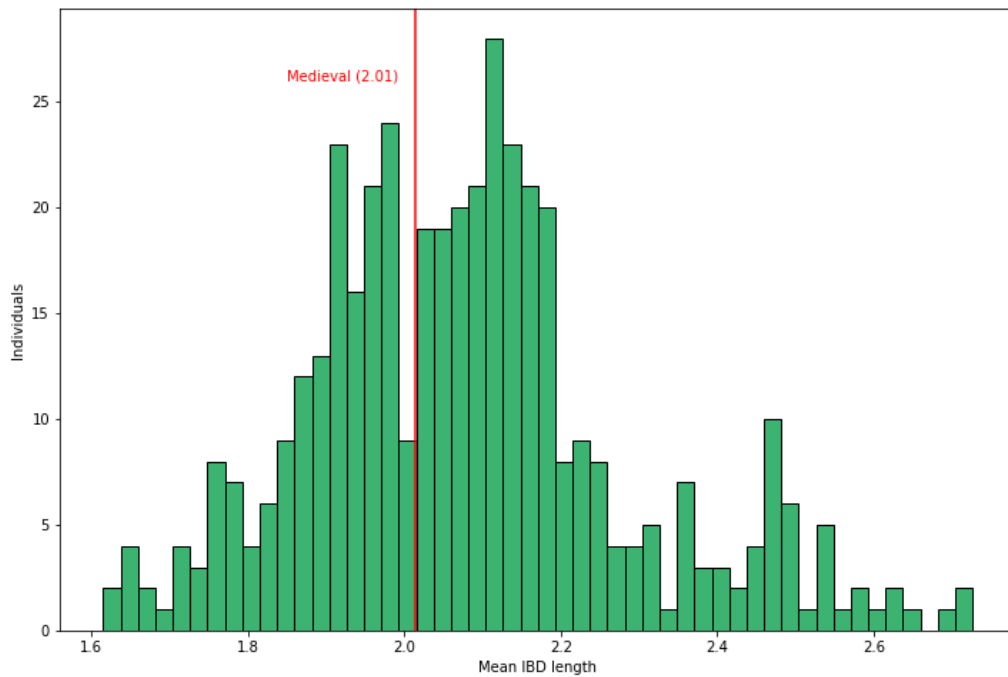

**Supplementary Figure S6.** Distribution of the mean length of the IBD blocks >1cM that each individual shares with individuals from other populations. In red the mean length of the IBD blocks shared by the Medieval with individuals of any population.

Individual Missingness vs Heterozygosity

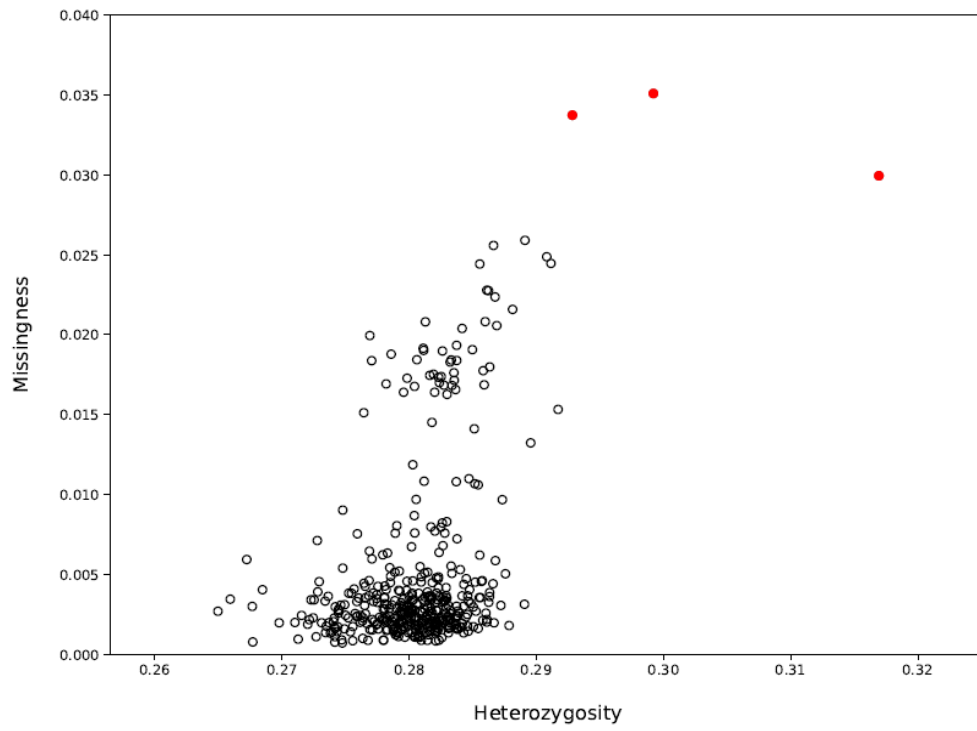

**Supplementary Figure S7.** Missingness of modern European individuals plotted against their heterozygosity. The three individuals marked in red were removed from the sample.

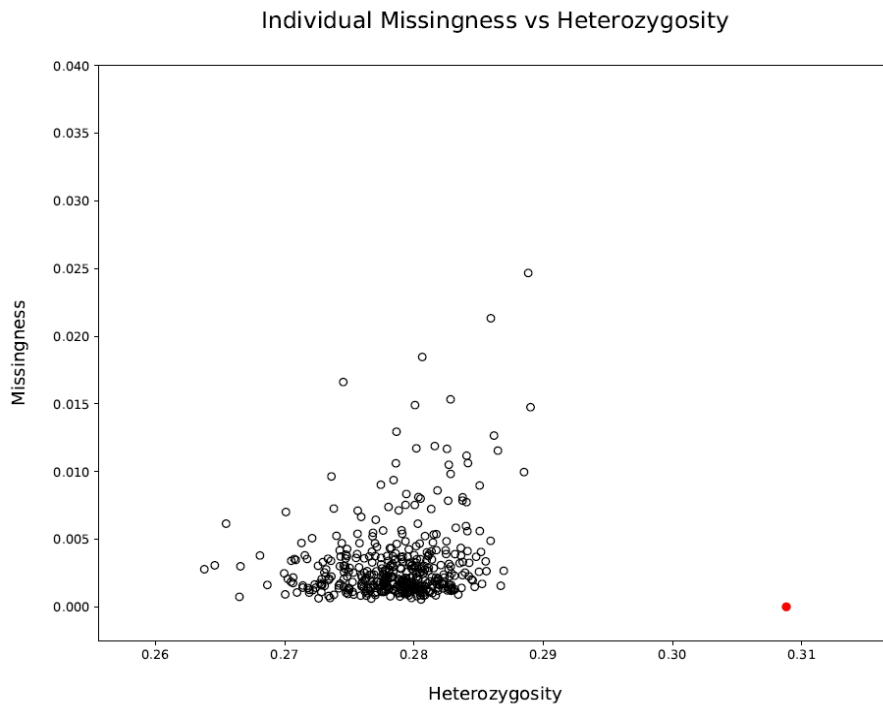

**Supplementary Figure S8.** Genotype missingness against heterozygosity in the individuals of the IBD dataset. The Medieval individual is marked in red.

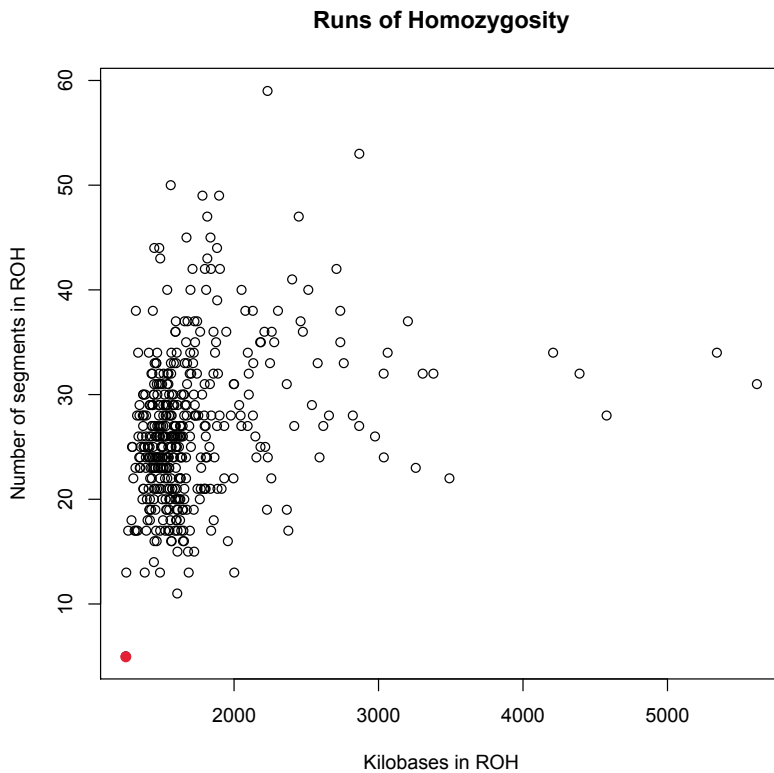

**Supplementary Figure S9.** Runs of Homozygosity (ROHs) in the dataset. The Medieval individual is marked in red.

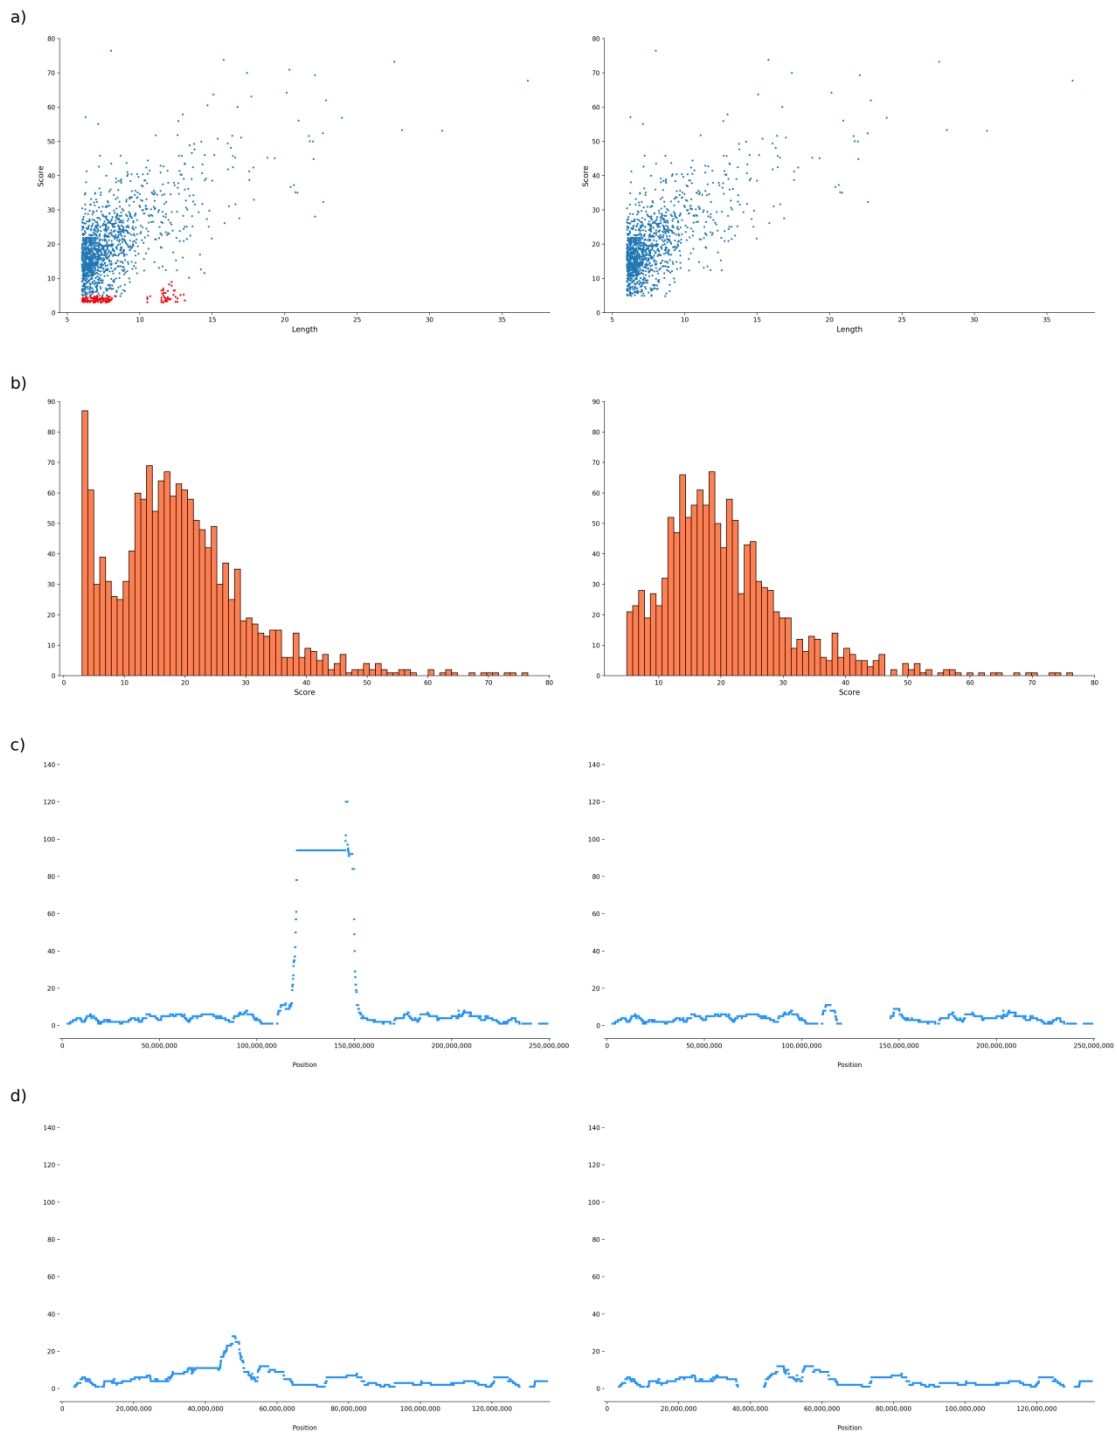

**Supplementary Figure S10.** IBD segments longer than 6 cM obtained from the European dataset before (left) and after (right) removal of those that did not meet quality control criteria. a) Plot of the score of each IBD segment against its length. Those marked in red were considered to cluster abnormally and were removed. b) Histogram of score values of obtained IBD segments. c) and d) IBD coverage for chromosomes 1 and 10. This corresponds to the number of IBD segments that fall into a particular genomic position.

a)

| Chr | Start      | End         | Ind1              | Ind2              | Score | Length |
|-----|------------|-------------|-------------------|-------------------|-------|--------|
| 1   | 87,665,502 | 101,530,528 | SouthFrench3326_2 | SouthFrench1112_1 | 32.69 | 13.18  |
| 1   | 87,932,732 | 95,116,807  | BAS22_1           | SouthFrench1112_1 | 17.62 | 7.1    |
| 1   | 87,932,732 | 95,116,807  | SouthFrench3326_2 | BAS22_1           | 18.54 | 7.1    |

CHR: 1

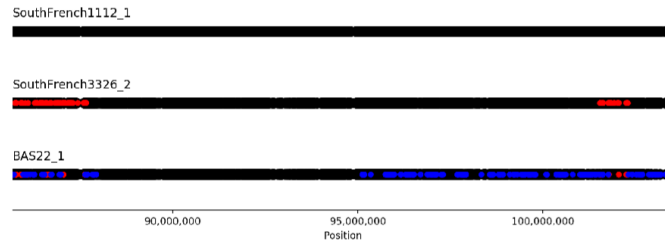

b)

| Chr | Start      | End        | Ind1        | Ind2        | Score | Length |
|-----|------------|------------|-------------|-------------|-------|--------|
| 1   | 58,466,016 | 63,501,940 | HGDP00807_1 | HGDP00810_1 | 27.51 | 7.67   |
| 1   | 63,498,807 | 79,065,052 | HGDP00807_1 | HGDP00810_2 | 40.76 | 14.29  |

CHR: 1

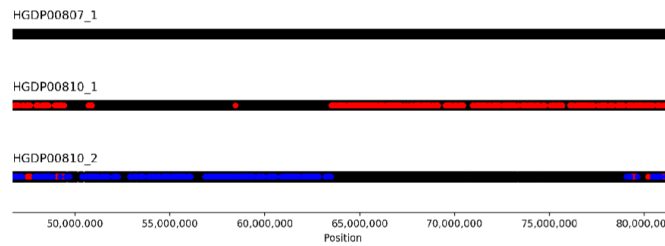

c)

| Chr | Start      | End        | Ind1      | Ind2    | Score | Length |
|-----|------------|------------|-----------|---------|-------|--------|
| 12  | 52,931,547 | 58,839,960 | BAS28_1   | BAS27_1 | 13.83 | 6.37   |
| 12  | 53,315,157 | 66,115,059 | HG01699_1 | BAS28_1 | 22.63 | 11.5   |

CHR: 12

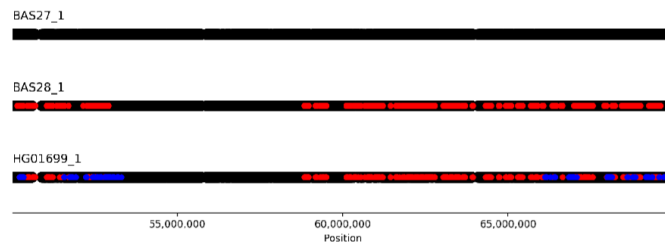



d)

| Chr | Start      | End        | Ind1        | Ind2        | Score | Length |
|-----|------------|------------|-------------|-------------|-------|--------|
| 12  | 65,921,662 | 76,538,614 | HGDP00805_1 | HGDP00806_2 | 31.56 | 13.8   |
| 12  | 66,522,359 | 70,448,946 | HGDP00805_1 | HGDP00810_2 | 15.59 | 6.0    |
| 12  | 66,522,359 | 70,448,946 | HGDP00806_2 | HGDP00810_2 | 13.9  | 6.0    |
| 12  | 70,458,817 | 76,538,614 | HGDP00805_1 | HGDP00810_2 | 10.8  | 6.57   |
| 12  | 70,458,817 | 78,490,195 | HGDP00806_2 | HGDP00810_2 | 17.41 | 8.7    |

CHR: 12

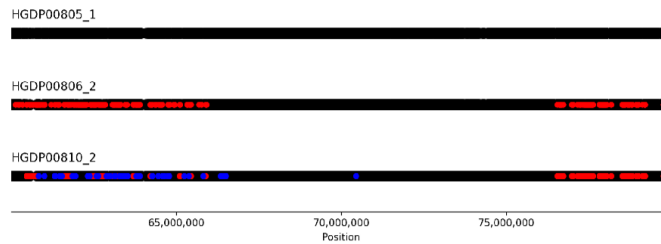

e)

| Chr | Start      | End        | Ind1        | Ind2              | Score | Length |
|-----|------------|------------|-------------|-------------------|-------|--------|
| 12  | 76,475,750 | 81,145,811 | HGDP00524_2 | HGDP01377_1       | 6.82  | 6.24   |
| 12  | 76,538,614 | 83,274,174 | HGDP01375_2 | HGDP01377_1       | 10.01 | 6.69   |
| 12  | 77,107,258 | 83,274,174 | HGDP01375_2 | SouthFrench3326_1 | 7.41  | 6.3    |
| 12  | 77,107,258 | 83,497,999 | HGDP01377_1 | SouthFrench3326_1 | 7.14  | 6.64   |
| 12  | 78,490,195 | 89,445,539 | HGDP01368_1 | HGDP01375_2       | 14.95 | 7.88   |
| 12  | 80,158,701 | 91,723,761 | HGDP01368_1 | SouthFrench4018_1 | 18.57 | 7.76   |

CHR: 12

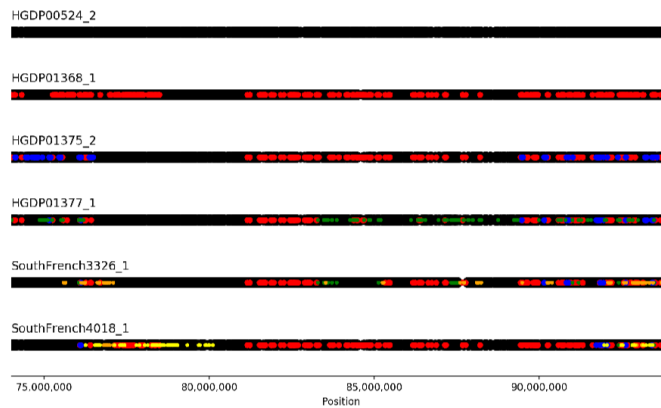

**Supplementary Figure S11.** Clusters of IBD blocks representing some of the typologies found. For each cluster we show on top the list of IBD segments involved. The label of the individuals of each IBD block is followed by a number (1 or 2) indicating the chromosome (from the two homologous chromosomes) responsible for the IBD. Below it there is a representation of the values of the SNPs in all the chromosomes involved on that cluster. For the first chromosome all SNPs are painted in black, for the second they are in black if they present the same allele than the first homologous chromosome and in red otherwise. For each subsequent chromosome new colors are added if a SNP presents a value not encountered before. This creates a visual pattern that allows us to easily

identify segments that are identical. a) A perfect triangulation with 3 IBD segments comprising 3 individuals. The differing length of the IBDs segments can be seen as the result of a shorter identical region in the third individual. b) Two IBD segments between one individual and two consecutive regions on both chromosomes of another individual. A haplotype estimation error is probably behind this pattern and so no third IBD segment should be expected to close the triangulation. c) An open triangulation. The chromosome view allow us to see that the missing IBD segment is shorter than the one 6.37 cM long. Being shorter than 6 cM, it was excluded from the filtered list. d) A multiplication of IBD segments in an apparent simple triangulation brought about by a single mutation/genotyping error shown as a blue point in the third individual. e) A complex cluster that generates various IBD segments with length slightly over 6cM.

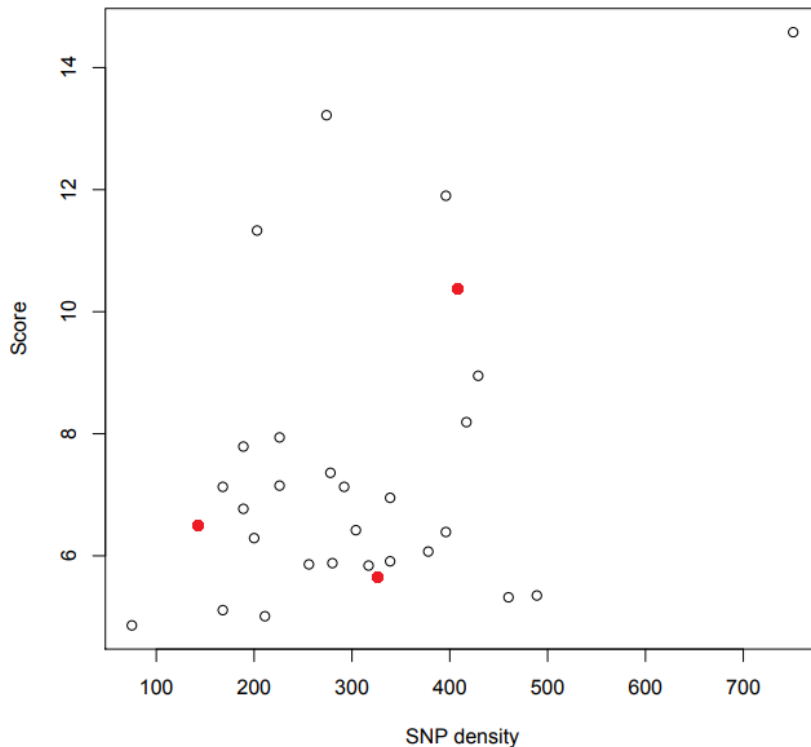

**Supplementary Figure S12.** SNP density in the Medieval (>2cM) IBD segments plotted against the refineIBD score; three IBD fragments found to be shared with three present-day Lithuanians and susceptible of being false-positives are marked in red. There is a weak positive correlation between higher scores and higher number of SNPs supporting each IBD fragment ( $R^2=0.165$ ,  $p=0.0135$ ).



**Supplementary Table S1.** European populations used in the IBD analysis.

| <b>Population</b> | <b>Individuals</b> |
|-------------------|--------------------|
| French            | 61                 |
| Spanish           | 53                 |
| Basque            | 29                 |
| Sardinian         | 27                 |
| Russian           | 22                 |
| Italian_North     | 20                 |
| Hungarian         | 20                 |
| Greek             | 20                 |
| Orcadian          | 13                 |
| Icelandic         | 12                 |
| Sicilian          | 11                 |
| Norwegian         | 11                 |
| Romanian          | 10                 |
| Lithuanian        | 10                 |
| Estonian          | 10                 |
| English           | 10                 |
| Czech             | 10                 |
| Croatian          | 10                 |
| Bulgarian         | 10                 |
| Belarusian        | 10                 |
| Ukrainian         | 9                  |
| Maltese           | 8                  |
| Cypriot           | 8                  |
| Finnish           | 7                  |
| Albanian          | 6                  |
| Spanish_North     | 5                  |
| Italian_South     | 5                  |
| Scottish          | 4                  |
| Canary_Islander   | 2                  |

**Supplementary Table S2.** IBD blocks longer than 6cM between pairs of European individuals.

**Supplementary Table S3.** IBD blocks longer than 2cM between the Medieval and modern individuals.
